# Supplementary material
Source: Springer Nature journal article supplement (https://www.springermedizin.de/resource/supplementary/12958_2009_562_MOESM4_ESM.pdf/9568322)

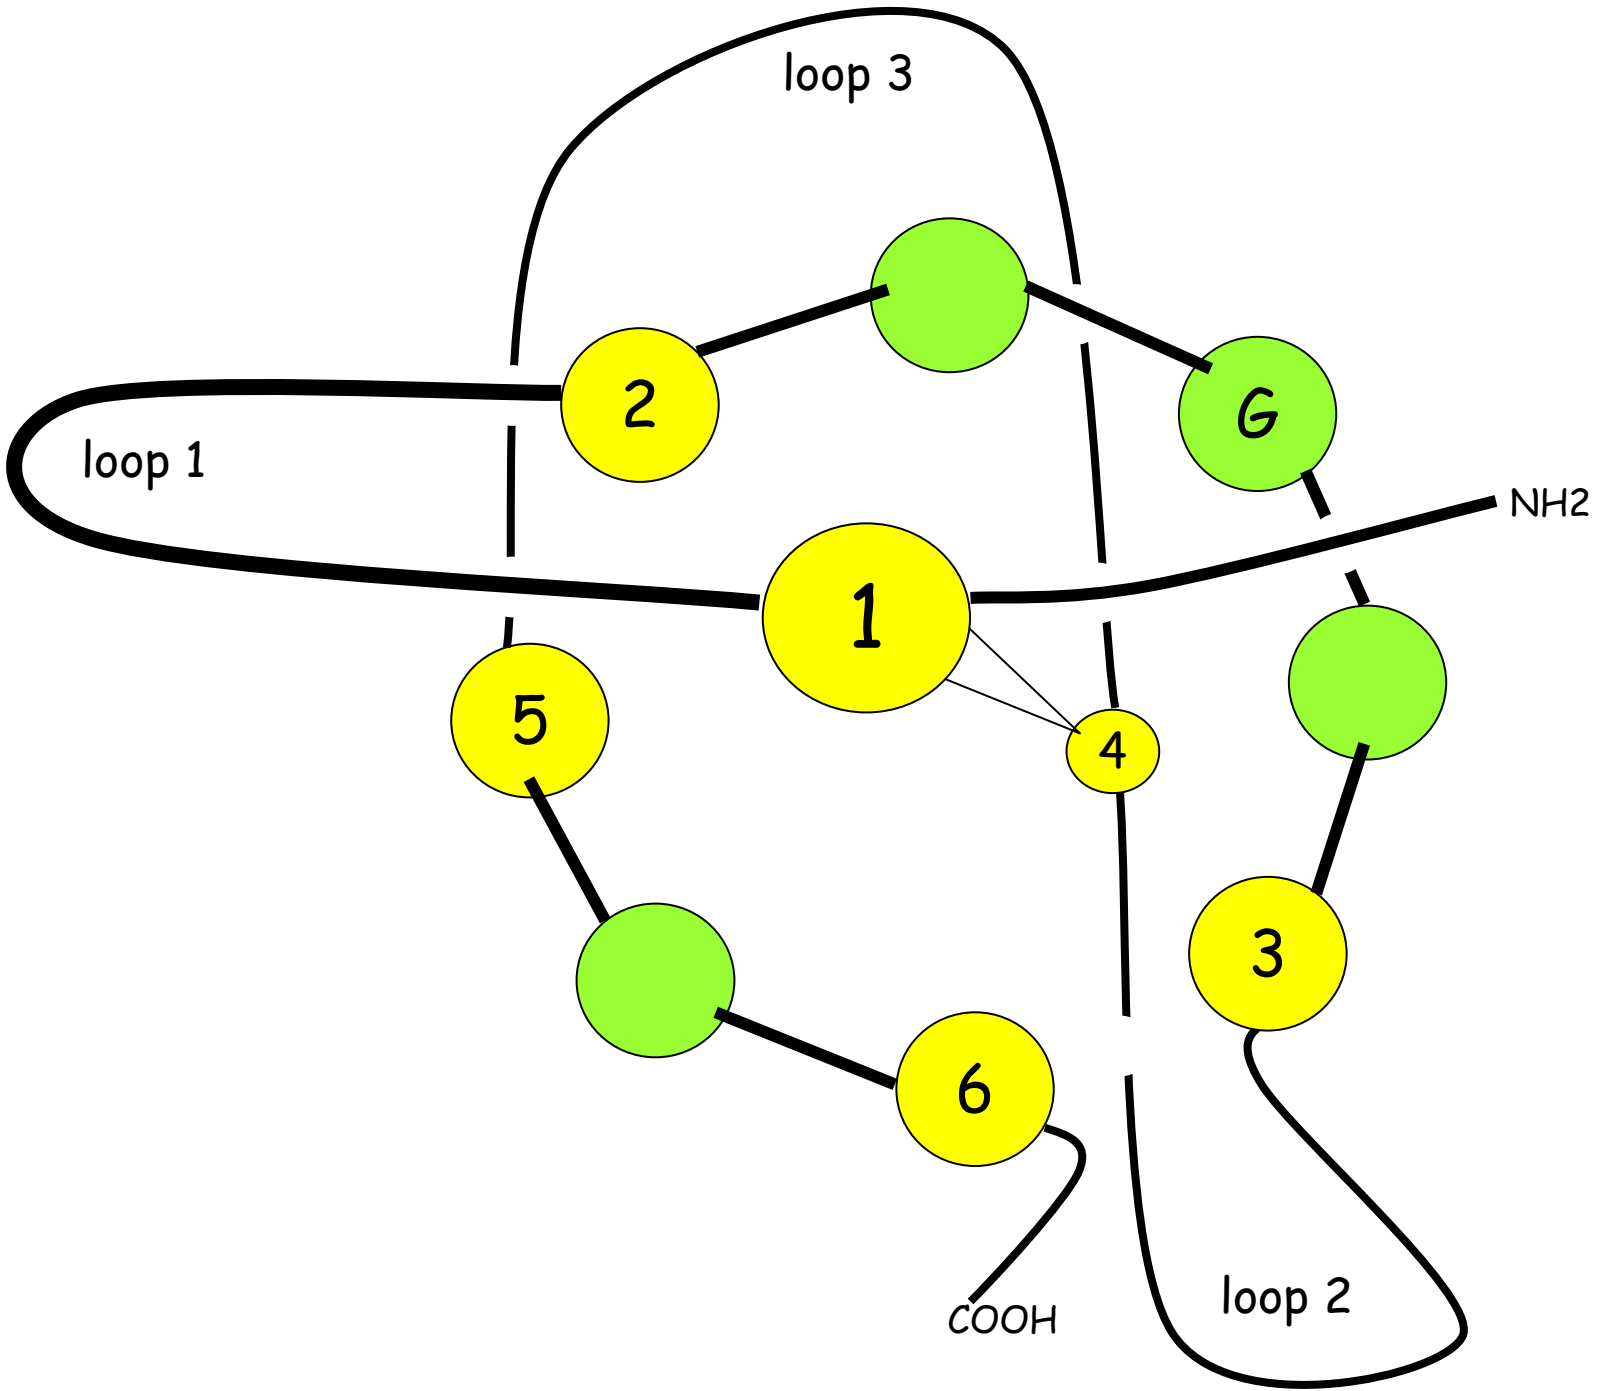

Supplement: MOESM4 [file 9568322]
